# Supplementary material
Source: HighWire-hosted journal article supplement (https://jitc.bmj.com/content/9/8/e003370)
Supplement: inline-supplementary-material-6 [file inline-supplementary-material-6.pdf]

**Supplementary Table 2.** Twelve and 36-month PFS and OS according to the median value or quartiles of the event-free probability calculated on the development set.

| Cure probability estimates, % | 12-month PFS, %<br>(95% CI) | 36-month PFS, %<br>(95% CI) | 12-month OS, %<br>(95% CI) | 36-month OS, %<br>(95% CI) |
|-------------------------------|-----------------------------|-----------------------------|----------------------------|----------------------------|
| <b>Median</b>                 |                             |                             |                            |                            |
| <46                           | 42.9<br>(32.8-56.0)         | 30.8<br>(21.1-44.9)         | 56.9<br>(46.4-69.9)        | 42.1<br>(31.0-57.1)        |
| ≥46                           | 84.1<br>(76.2-92.8)         | 67.0<br>(56.2-79.8)         | 90.3<br>(83.7-97.4)        | 75.0<br>(64.5-87.3)        |
| <b>Quartiles</b>              |                             |                             |                            |                            |
| <24                           | 36.4<br>(23.5-56.3)         | 20.8<br>(10.2-42.3)         | 49.4<br>(35.1-69.6)        | 32.2<br>(18.7-55.7)        |
| [24-46)                       | 49.7<br>(35.9-68.9)         | 41.0<br>(26.9-62.6)         | 64.7<br>(50.9-82.4)        | 52.0<br>(36.8-73.5)        |
| [46-62)                       | 77.9<br>(65.5-92.7)         | 59.2<br>(43.9-79.9)         | 81.7<br>(69.4-96.2)        | 73.0<br>(58.3-91.6)        |
| ≥62                           | 89.7<br>(80.6-99.8)         | 73.9<br>(60.3-90.6)         | 97.5<br>(92.8-100)         | 77.8<br>(64.3-94.1)        |

Note: Square brackets indicate that the number is included in the interval, whereas round brackets indicate that the number is excluded from the interval.

**Supplementary table 2 legends:** CI: confidence interval; OS: overall survival; PFS: progression-free survival
